# Supplementary figures and images for: New nano-architectures of mesoporous silica spheres analyzed by advanced electron microscopy
Source: Royal Society of Chemistry journal article supplement (doi:10.1039/c2nr11715k), 2011-12-21

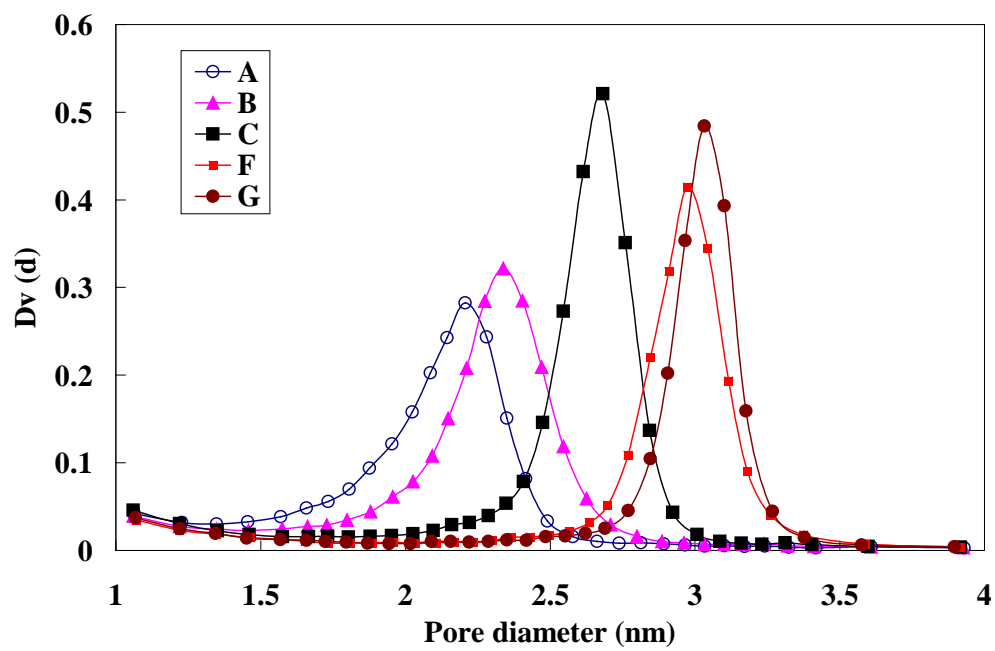

**Figure S1.** Pore size distribution for A,B,C,F and G samples

Supplement: c2nr11715k.pdf [file c2nr11715k.pdf]
